# Supplementary material for: Bis(6-diphenylphosphinoacenaphth-5-yl)telluride as a ligand toward coinage metal chlorides
Source: Royal Society of Chemistry journal article supplement (doi:10.1039/c9dt00089e), 2019-01-01
Supplement: c9dt00089e1.pdf [file c9dt00089e1.pdf]

## Dalton Transaction - Full Article

### Bis(6-diphenylphosphinoacenaphth-5-yl)telluride as Ligand

### Towards Coinage Metal Chlorids

Truong Giang Do,<sup>a</sup> Emanuel Hupf,<sup>a,b</sup> Enno Lork,<sup>a</sup> Stefan Mebs,<sup>c</sup>\* Jens Beckmann<sup>a</sup>\*

<sup>a</sup> *Institut für Anorganische Chemie, Universität Bremen, Leobener Straße, 28359 Bremen, Germany*

<sup>b</sup> *Department of Chemistry, University of Alberta, 11227 Saskatchewan Dr., Edmonton, Alberta,  
T6G 2G2, Canada*

<sup>c</sup> *Institut für Experimentalphysik, Freie Universität Berlin, Arnimallee 14, 14195 Berlin, Germany*

### Supporting Information

#### Contents

#### Experimental Section

**Figure S1a** <sup>1</sup>H-NMR spectrum of **7** (CD<sub>2</sub>Cl<sub>2</sub>).

**Figure S1b** <sup>13</sup>C {<sup>1</sup>H}-NMR spectrum of **7** (CD<sub>2</sub>Cl<sub>2</sub>).

**Figure S1c** <sup>31</sup>P {<sup>1</sup>H}-NMR spectrum of **7** (CD<sub>2</sub>Cl<sub>2</sub>).

**Figure S1d** <sup>125</sup>Te {<sup>1</sup>H}-NMR spectrum of **7** (CD<sub>2</sub>Cl<sub>2</sub>).

**Figure S2a** <sup>1</sup>H-NMR spectrum of **8** (CD<sub>2</sub>Cl<sub>2</sub>).

**Figure S2b** <sup>13</sup>C {<sup>1</sup>H}-NMR spectrum of **8** (CD<sub>2</sub>Cl<sub>2</sub>).

**Figure S2c** <sup>31</sup>P {<sup>1</sup>H}-NMR spectrum of **8** (CD<sub>2</sub>Cl<sub>2</sub>).

**Figure S2d** <sup>125</sup>Te {<sup>1</sup>H}-NMR spectrum of **8** (CD<sub>2</sub>Cl<sub>2</sub>).

---

\* Correspondence to Jens Beckmann (E-mail: [j.beckmann@uni-bremen.de](mailto:j.beckmann@uni-bremen.de)) and Stefan Mebs (E-mail: [steb@chemie.fu-berlin.de](mailto:steb@chemie.fu-berlin.de))

- Figure S3a**  $^1\text{H}$ -NMR spectrum of **12** ( $\text{CD}_2\text{Cl}_2$ ).
- Figure S3b**  $^{13}\text{C}\{^1\text{H}\}$ -NMR spectrum of **12** ( $\text{CD}_2\text{Cl}_2$ ).
- Figure S3c**  $^{31}\text{P}\{^1\text{H}\}$ -NMR spectrum of **12** ( $\text{CD}_2\text{Cl}_2$ ).
- Figure S3d**  $^{125}\text{Te}\{^1\text{H}\}$ -NMR spectrum of **12** ( $\text{CD}_2\text{Cl}_2$ ).
- Figure S4** The molar conductivity of **12** in  $\text{CH}_2\text{Cl}_2$ .

#### DFT calculations

- Table S1** Topological and integrated bond descriptors of relevant bonds.
- Figure S5** Labelling scheme for (a) **6**, (b) **7**, (c) **8**.
- Figure S6** Labelling scheme for (a) **12**, (b) **13**.

## Experimental Section

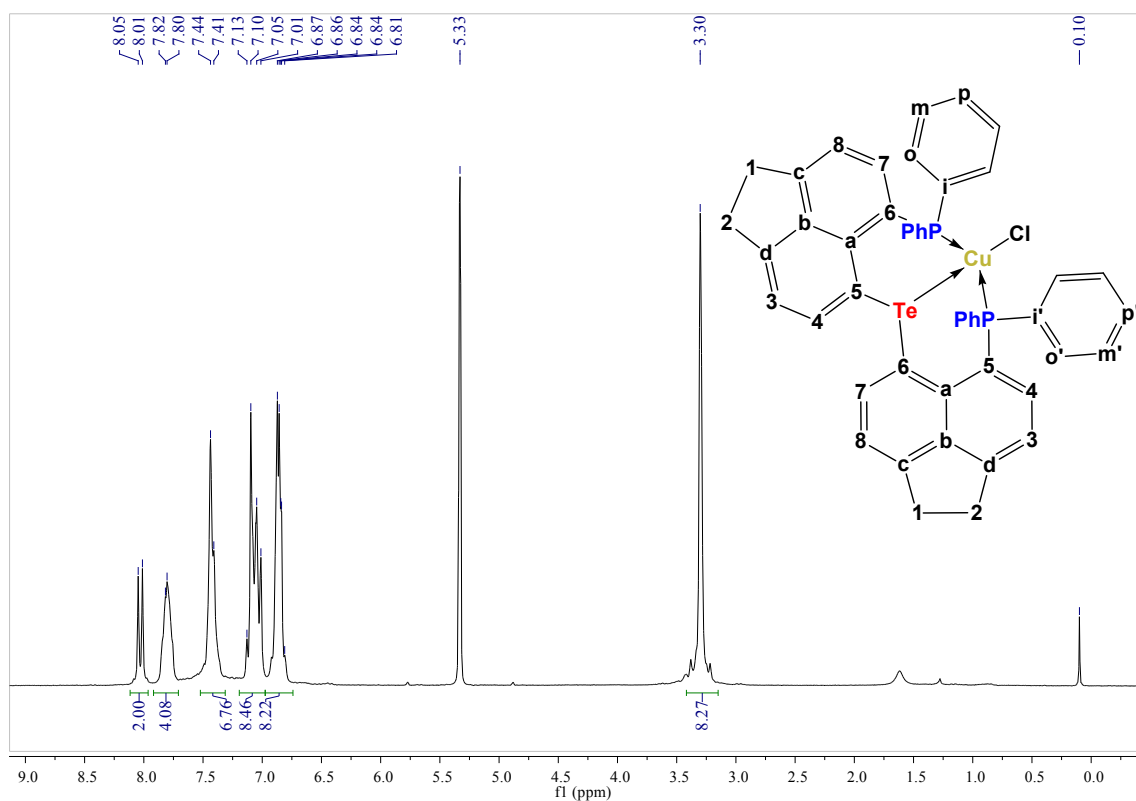

**Figure S1a:**  $^1\text{H-NMR}$  spectrum ( $\text{CD}_2\text{Cl}_2$ ) of **7**.

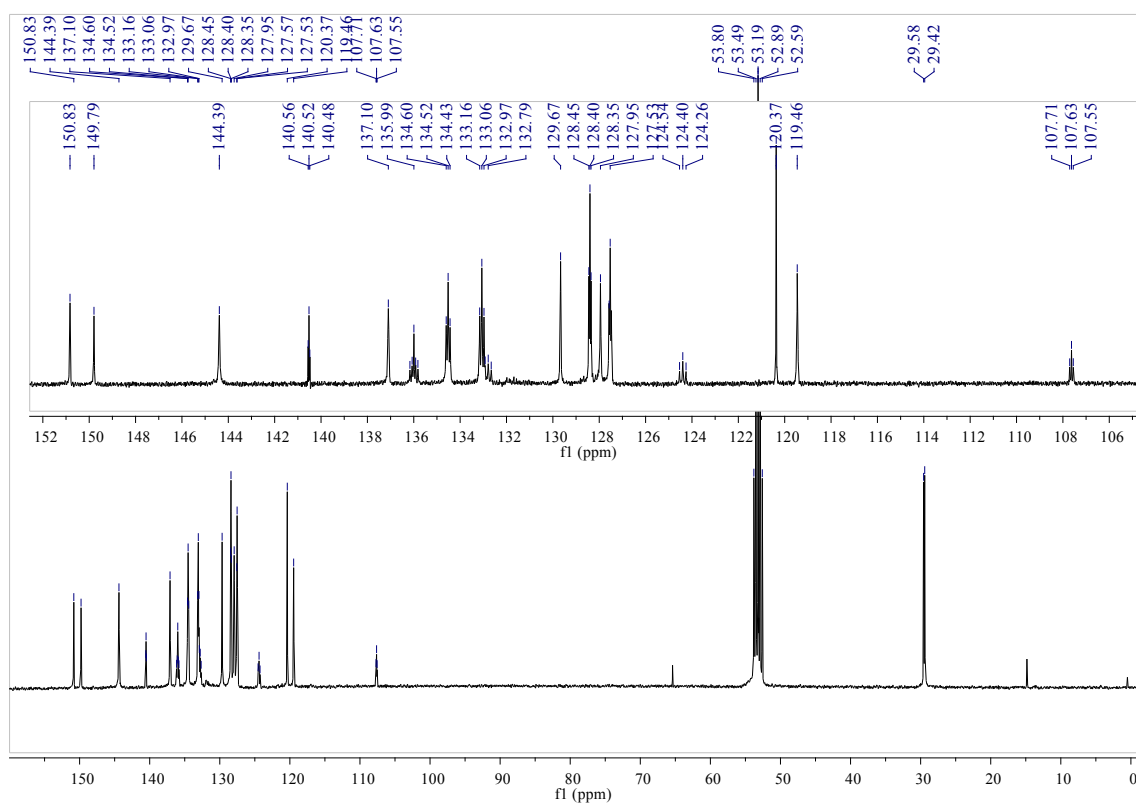

**Figure S1b:**  $^{13}\text{C}\{^1\text{H}\}$ -NMR spectrum ( $\text{CD}_2\text{Cl}_2$ ) of **7**.

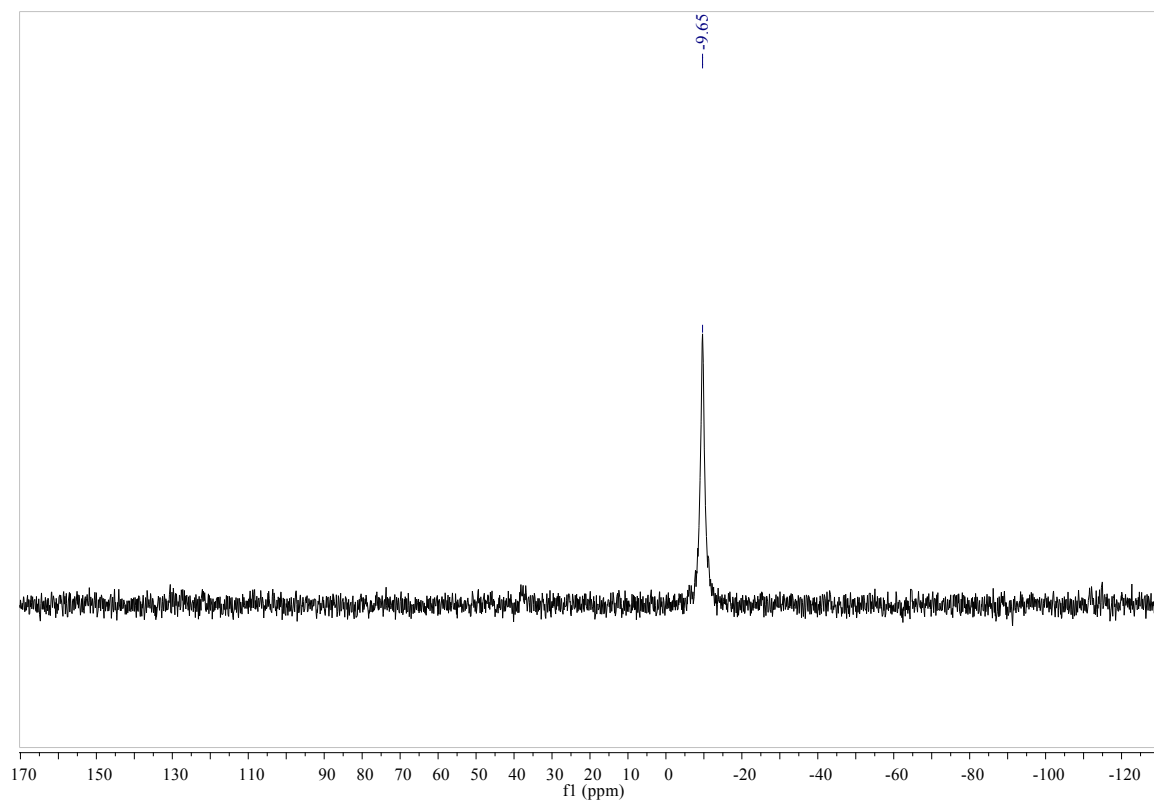

**Figure S1c:**  $^{31}\text{P}\{^1\text{H}\}$ -NMR spectrum ( $\text{CD}_2\text{Cl}_2$ ) of **7**.

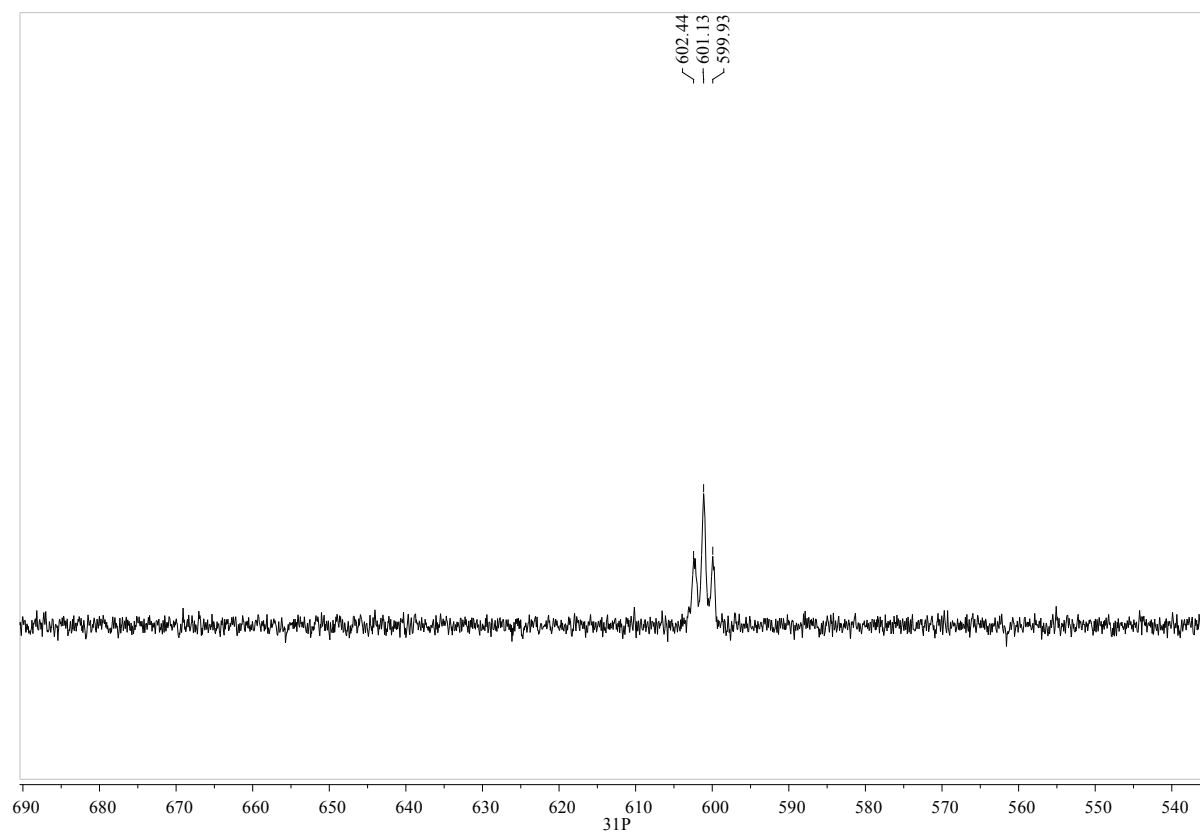

**Figure S1d:**  $^{125}\text{Te}\{^1\text{H}\}$ -NMR spectrum ( $\text{CD}_2\text{Cl}_2$ ) of **7**.

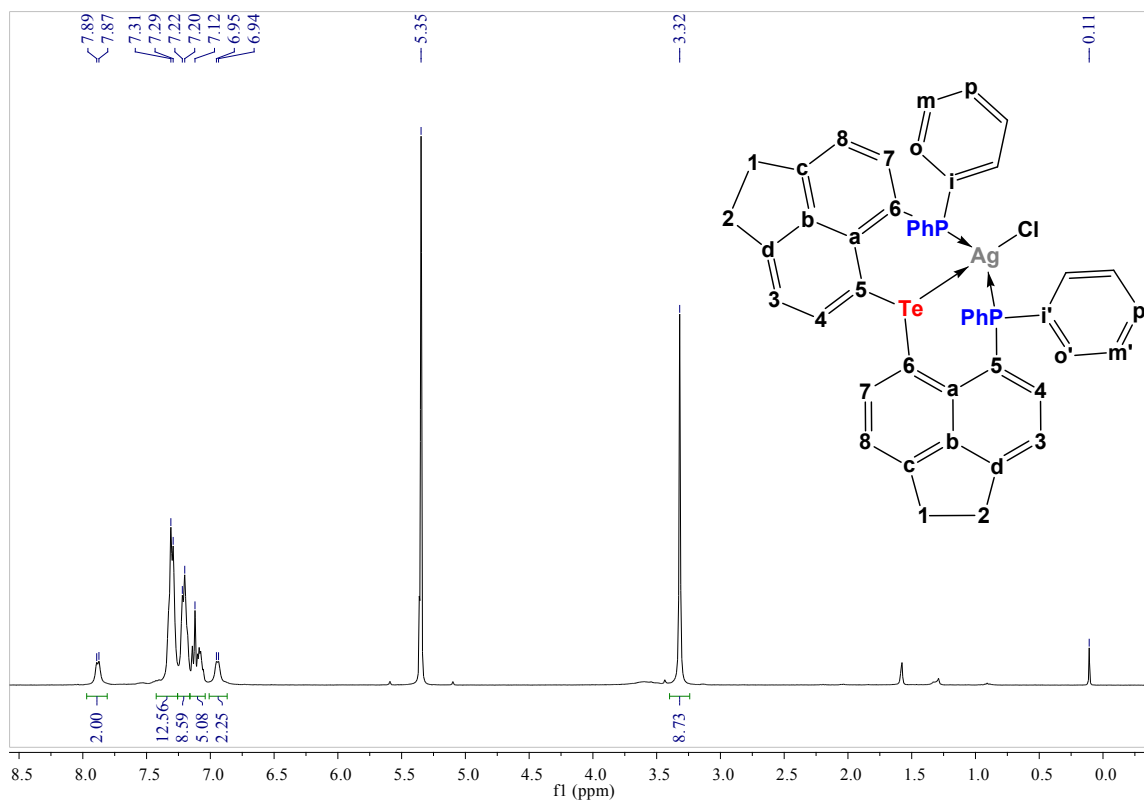

**Figure S2a.** <sup>1</sup>H-NMR spectrum (CD<sub>2</sub>Cl<sub>2</sub>) of **8**.

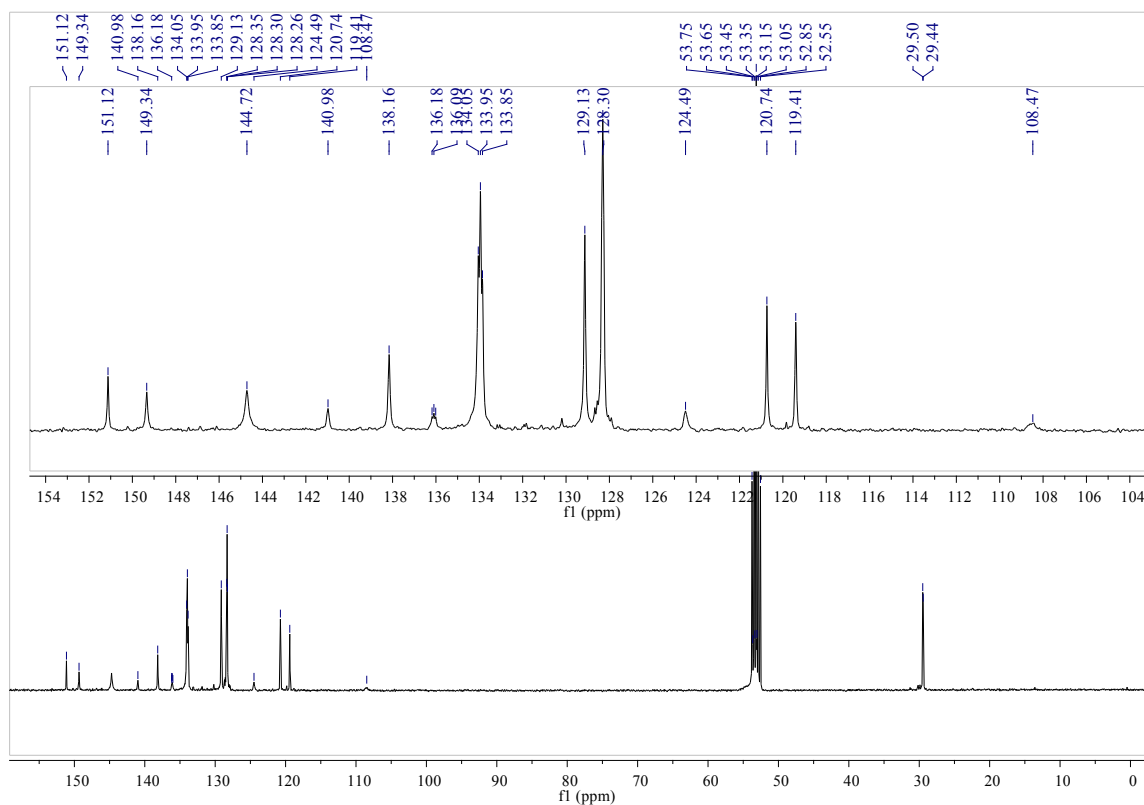

**Figure S2b.** <sup>13</sup>C{<sup>1</sup>H}-NMR spectrum (CD<sub>2</sub>Cl<sub>2</sub>) of **8**.

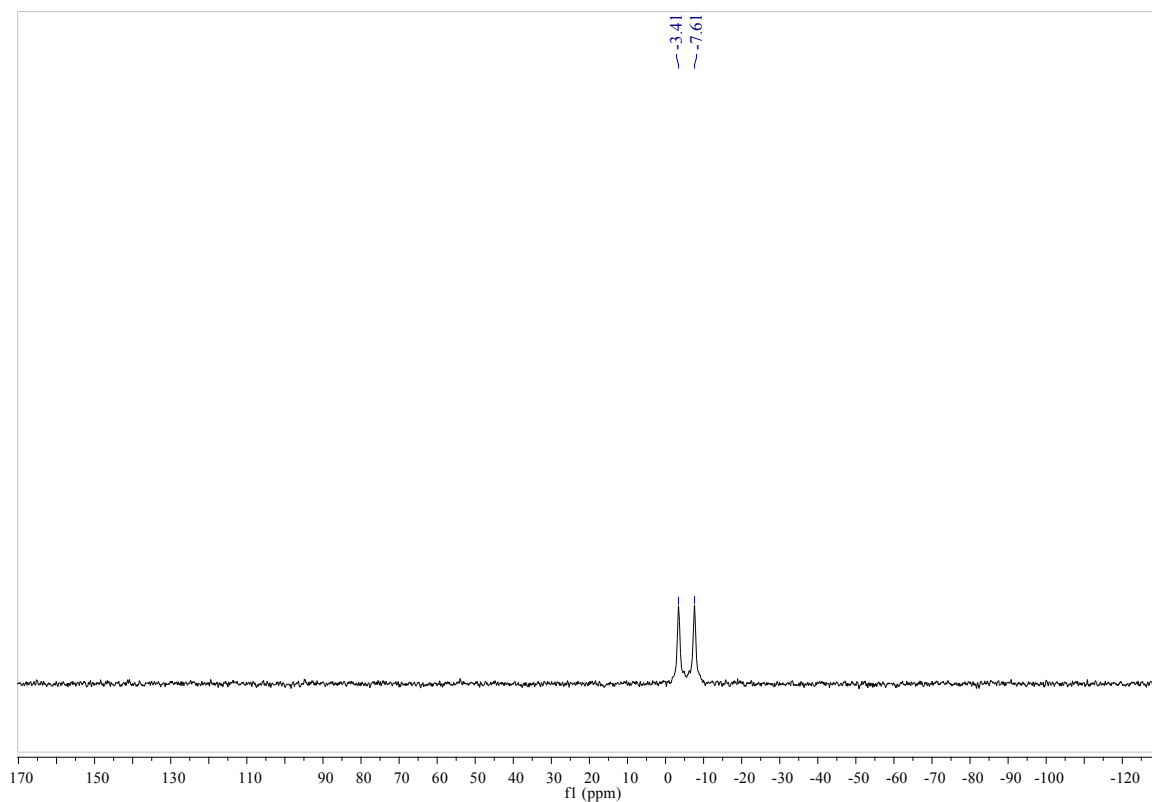

**Figure S2c:**  $^{31}\text{P}\{^1\text{H}\}$ -NMR spectrum ( $\text{CD}_2\text{Cl}_2$ ) of **8**.

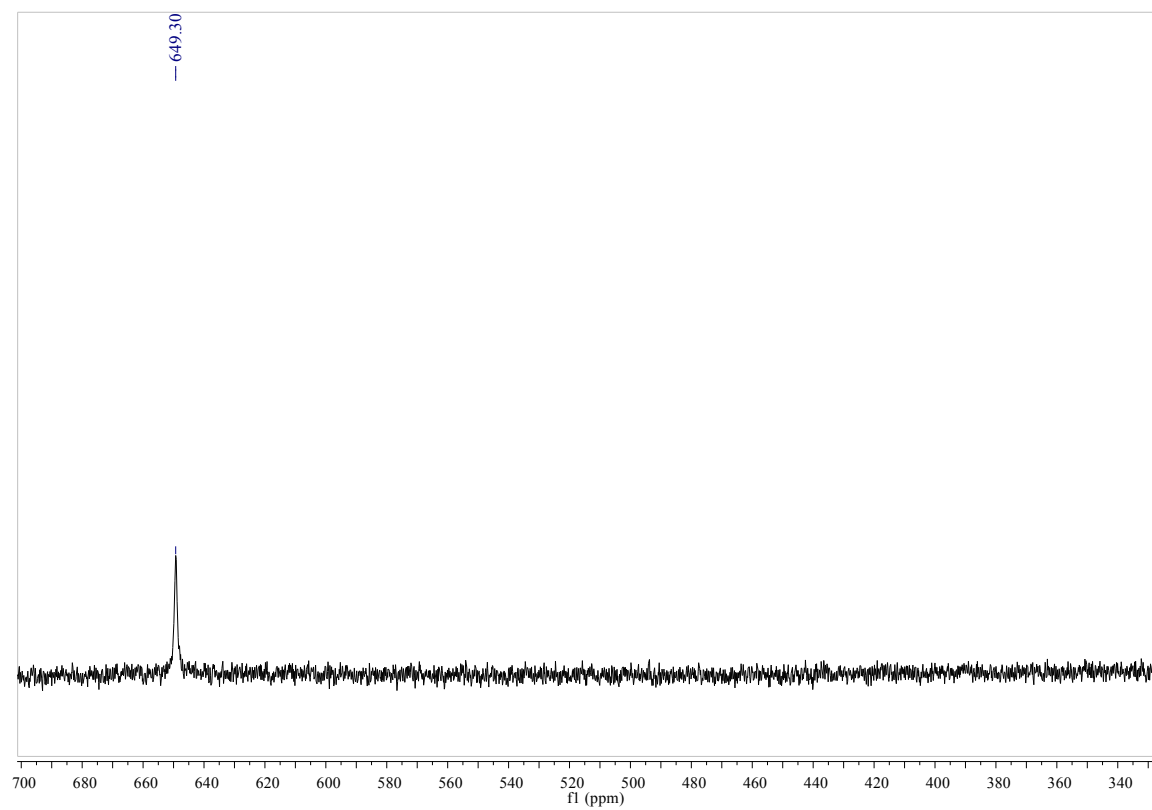

**Figure S2d:**  $^{125}\text{Te}\{^1\text{H}\}$ -NMR spectrum ( $\text{CD}_2\text{Cl}_2$ ) of **8**.

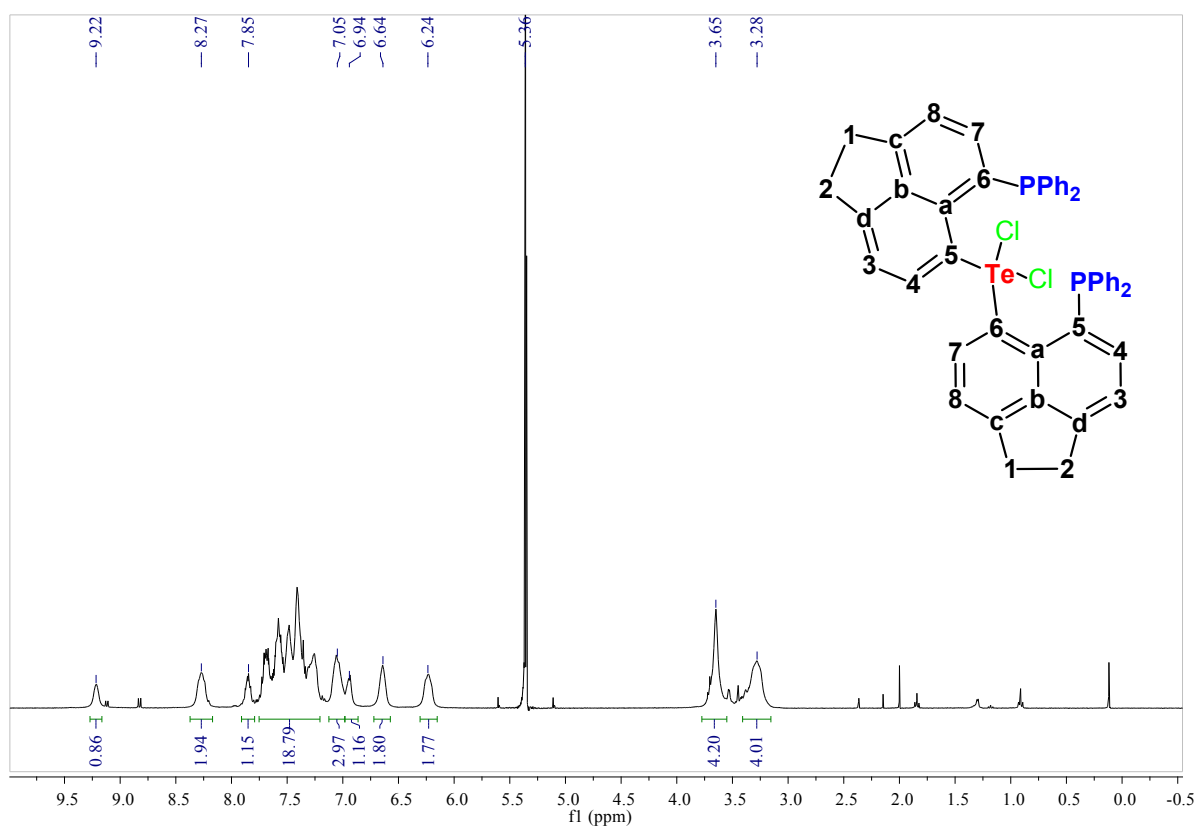

Figure S3a. <sup>1</sup>H-NMR spectrum (CD<sub>2</sub>Cl<sub>2</sub>) of 12.

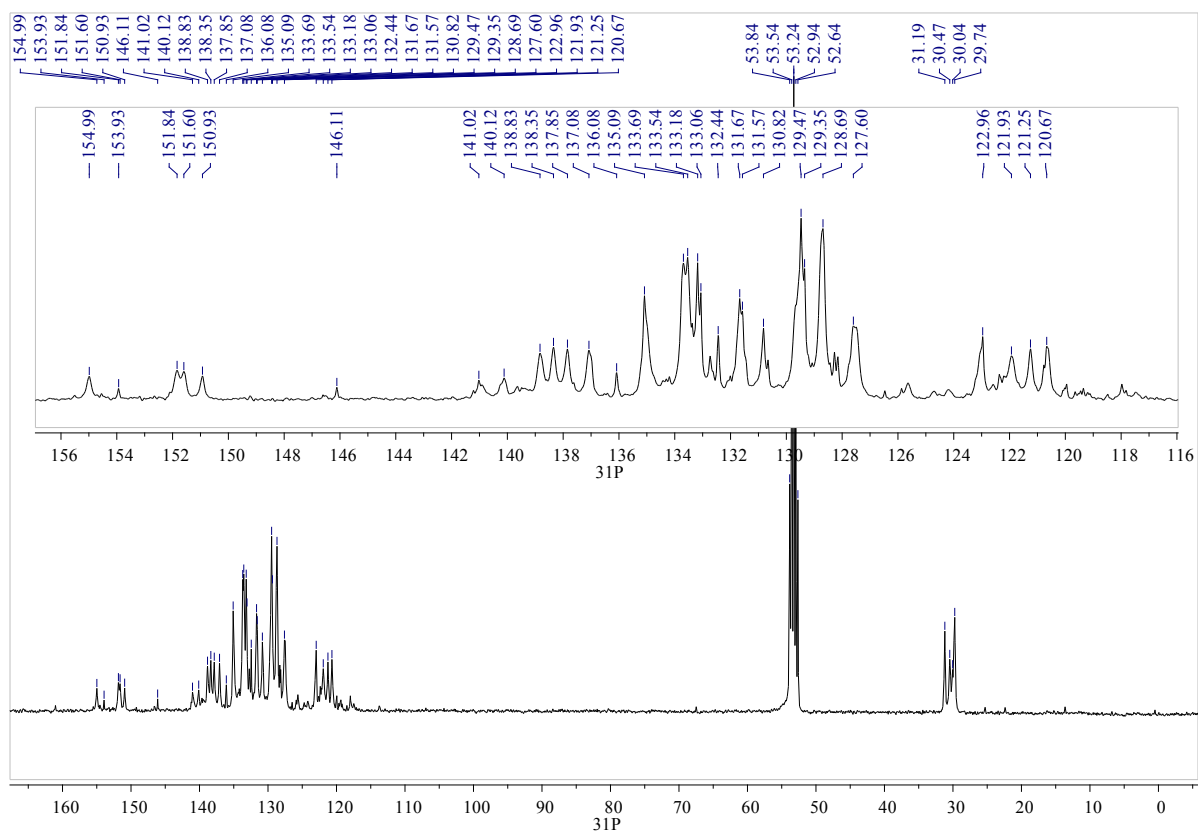

Figure S3b. <sup>13</sup>C{<sup>1</sup>H}-NMR spectrum (CD<sub>2</sub>Cl<sub>2</sub>) of 12.

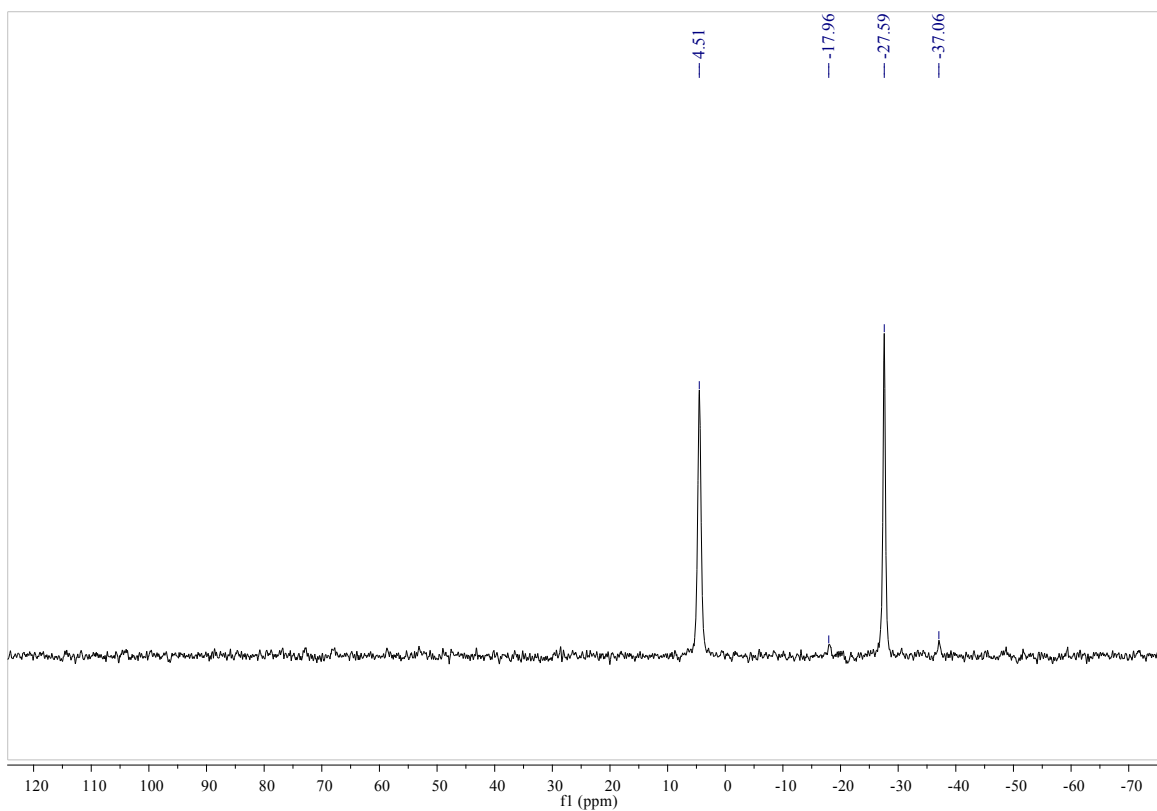

**Figure S3c.**  $^{31}\text{P}\{^1\text{H}\}$ -NMR spectrum ( $\text{CD}_2\text{Cl}_2$ ) of **12**.

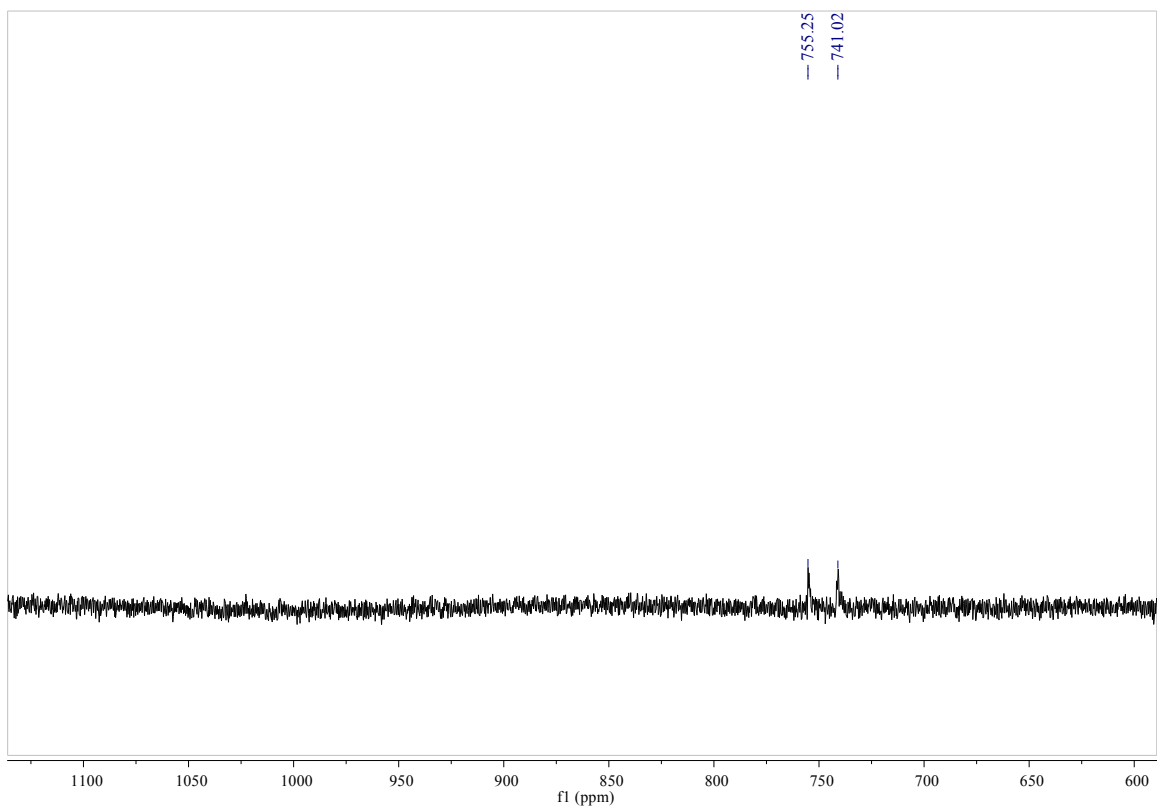

**Figure S3d.**  $^{125}\text{Te}\{^1\text{H}\}$ -NMR spectrum ( $\text{CD}_2\text{Cl}_2$ ) of **12**.



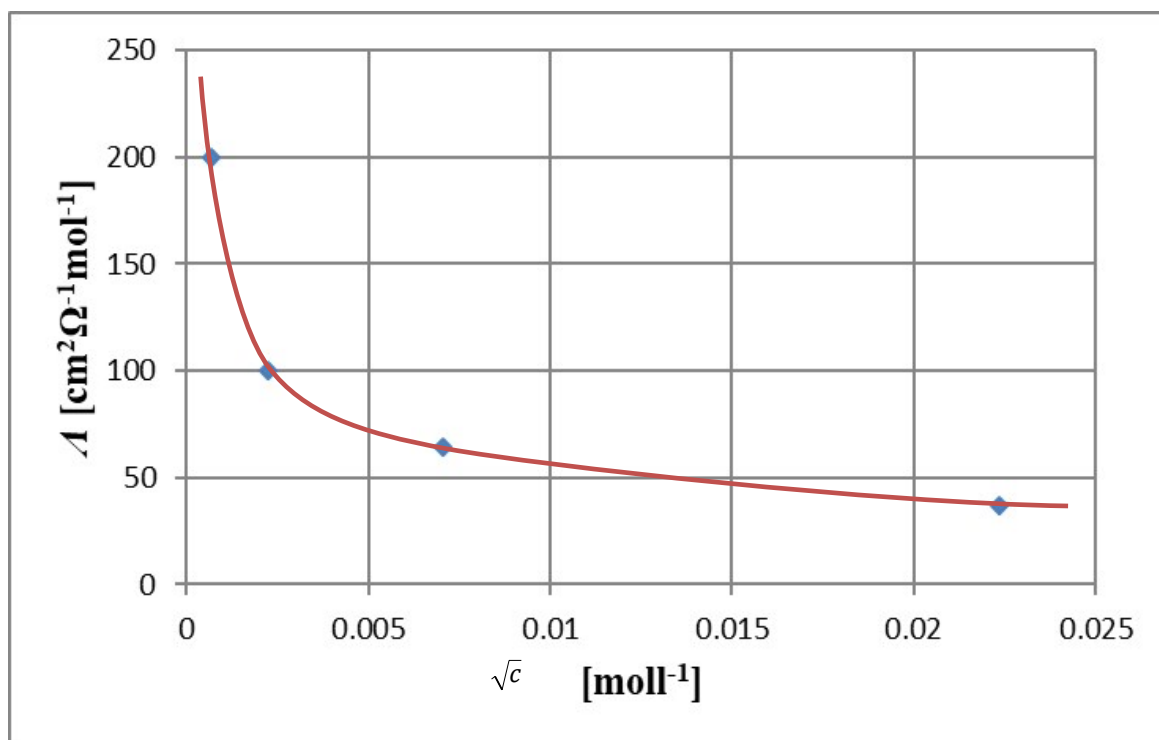

**Figure S4.** The molar conductivity of **12** in  $\text{CH}_2\text{Cl}_2$

**Table S1.** Topological and integrated bond descriptors of relevant bonds of **6**, **7**, **8**, **12'** and **13'**

|            | bond   | $d_1+d_2$<br>[Å] | $\rho(\mathbf{r})_{\text{bcp}}$<br>[eÅ <sup>-3</sup> ] | $\nabla^2\rho(\mathbf{r})_{\text{bcp}}$<br>[eÅ <sup>-5</sup> ] | $G/\rho(\mathbf{r})_{\text{bcp}}$<br>[a.u.] | $H/\rho(\mathbf{r})_{\text{bcp}}$<br>[a.u.] | $N_{\text{ELI}}$<br>[e] | $V_{\text{ELI}}$<br>[Å <sup>3</sup> ] | $Y_{\text{max}}$ | $\Delta_{\text{ELI}}$<br>[Å] | RJI<br>[%] |
|------------|--------|------------------|--------------------------------------------------------|----------------------------------------------------------------|---------------------------------------------|---------------------------------------------|-------------------------|---------------------------------------|------------------|------------------------------|------------|
| <b>6</b>   | Te-P2  | 3.369            | 0.13                                                   | 0.7                                                            | 0.42                                        | -0.04                                       | 2.09                    | 13.5                                  | 2.46             | LP                           | 98.3       |
|            | Te-P3  | 3.137            | 0.18                                                   | 0.9                                                            | 0.46                                        | -0.09                                       | 2.04                    | 13.1                                  | 2.31             | LP                           | 97.8       |
|            | Te-C4  | 2.158            | 0.77                                                   | 0.1                                                            | 0.52                                        | -0.50                                       | 2.04                    | 5.4                                   | 1.71             | 0.142                        | 74.9       |
|            | Te-C28 | 2.143            | 0.79                                                   | -0.3                                                           | 0.49                                        | -0.51                                       | 1.94                    | 5.0                                   | 1.68             | 0.031                        | 71.8       |
| <b>7</b>   | Te-Cu  | 2.558            | 0.40                                                   | 2.6                                                            | 0.73                                        | -0.27                                       | 2.18                    | 10.4                                  | 1.33             | 0.804                        | 79.3       |
|            | LP(Te) | -                | -                                                      | -                                                              | -                                           | -                                           | 2.49                    | 19.5                                  | 1.88             | LP                           | -          |
|            | Cu-Cl  | 2.256            | 0.50                                                   | 5.4                                                            | 1.03                                        | -0.27                                       | 0.43                    | 0.6                                   | 1.49             | 0.009                        | 88.7       |
|            | Cu-P4  | 2.215            | 0.60                                                   | 4.0                                                            | 0.84                                        | -0.37                                       | 2.52                    | 13.3                                  | 1.69             | 0.288                        | 73.1       |
|            | Cu-P5  | 2.234            | 0.58                                                   | 3.9                                                            | 0.84                                        | -0.36                                       | 2.40                    | 11.0                                  | 1.73             | 0.348                        | 77.1       |
|            | Te-C6  | 2.124            | 0.82                                                   | -0.2                                                           | 0.51                                        | -0.53                                       | 2.03                    | 5.6                                   | 1.69             | 0.138                        | 71.8       |
|            | Te-C30 | 2.144            | 0.79                                                   | -0.3                                                           | 0.49                                        | -0.52                                       | 1.98                    | 5.5                                   | 1.68             | 0.067                        | 71.1       |
| <b>8</b>   | Te-Ag  | 2.877            | 0.29                                                   | 2.0                                                            | 0.66                                        | -0.17                                       | 2.17                    | 11.9                                  | 1.41             | LP                           | 93.9       |
|            | LP(Te) | -                | -                                                      | -                                                              | -                                           | -                                           | 2.36                    | 18.5                                  | 1.88             | LP                           | -          |
|            | Ag-Cl  | 2.463            | 0.43                                                   | 4.4                                                            | 0.93                                        | -0.21                                       |                         |                                       |                  | no ELI-D basin               |            |
|            | Ag-P4  | 2.462            | 0.49                                                   | 3.2                                                            | 0.76                                        | -0.29                                       | 2.12                    | 10.6                                  | 1.78             | 0.356                        | 85.6       |
|            | Ag-P5  | 2.429            | 0.51                                                   | 3.5                                                            | 0.78                                        | -0.31                                       | 2.13                    | 10.3                                  | 1.74             | 0.330                        | 84.9       |
|            | Te-C6  | 2.146            | 0.79                                                   | -0.4                                                           | 0.48                                        | -0.51                                       | 1.97                    | 5.3                                   | 1.68             | 0.087                        | 70.8       |
|            | Te-C30 | 2.125            | 0.82                                                   | -0.2                                                           | 0.51                                        | -0.52                                       | 2.01                    | 5.3                                   | 1.68             | 0.131                        | 71.1       |
| <b>12'</b> | Te-Cl  | 2.619            | 0.41                                                   | 1.3                                                            | 0.49                                        | -0.27                                       |                         |                                       |                  | no ELI-D basin               |            |
|            | Te-P3  | 2.654            | 0.48                                                   | -0.2                                                           | 0.32                                        | -0.35                                       | 2.01                    | 7.9                                   | 1.91             | 0.158                        | 76.1       |
|            | Te-P4  | 3.186            | 0.17                                                   | 0.8                                                            | 0.40                                        | -0.09                                       | 2.02                    | 12.8                                  | 2.35             | LP                           | 97.6       |
|            | Te-C9  | 2.145            | 0.82                                                   | -1.0                                                           | 0.44                                        | -0.53                                       | 2.15                    | 5.9                                   | 1.66             | 0.130                        | 64.0       |
|            | Te-C31 | 2.157            | 0.80                                                   | -1.5                                                           | 0.39                                        | -0.52                                       | 2.09                    | 5.7                                   | 1.65             | 0.053                        | 57.7       |
| <b>13'</b> | Te-Cl  | 2.443            | 0.56                                                   | 1.3                                                            | 0.55                                        | -0.39                                       |                         |                                       |                  | no ELI-D basin               |            |
|            | Te-N3  | 2.442            | 0.41                                                   | 1.9                                                            | 0.56                                        | -0.23                                       | 2.08                    | 4.2                                   | 1.82             | LP                           | 95.1       |
|            | Te-N4  | 2.799            | 0.22                                                   | 1.4                                                            | 0.52                                        | -0.07                                       | 2.12                    | 4.9                                   | 1.91             | LP                           | 99.6       |
|            | Te-C9  | 2.141            | 0.83                                                   | -1.2                                                           | 0.43                                        | -0.54                                       | 2.16                    | 5.9                                   | 1.67             | 0.057                        | 63.1       |
|            | Te-C19 | 2.146            | 0.82                                                   | -1.6                                                           | 0.40                                        | -0.53                                       | 2.18                    | 6.2                                   | 1.66             | 0.038                        | 58.4       |

For all bonds,  $d_1$  and  $d_2$  are the distances of the atoms to the bcp,  $\rho(\mathbf{r})_{\text{bcp}}$  is the electron density at the bond critical point,  $\nabla^2\rho(\mathbf{r})_{\text{bcp}}$  is the corresponding Laplacian,  $G/\rho(\mathbf{r})_{\text{bcp}}$  and  $H/\rho(\mathbf{r})_{\text{bcp}}$  are the kinetic and total energy density over  $\rho(\mathbf{r})_{\text{bcp}}$  ratios,  $N_{\text{ELI}}$  and  $V_{\text{ELI}}$  are the electron population and volume of the ELI-D basin,  $Y_{\text{max}}$  is the ELI-D value at the attractor position,  $\Delta_{\text{ELI}}$  is the distance of the attractor position to the atom-atom axis, RJI is the Raub-Jansen Index. For labelling, see Figures S5 and S9.

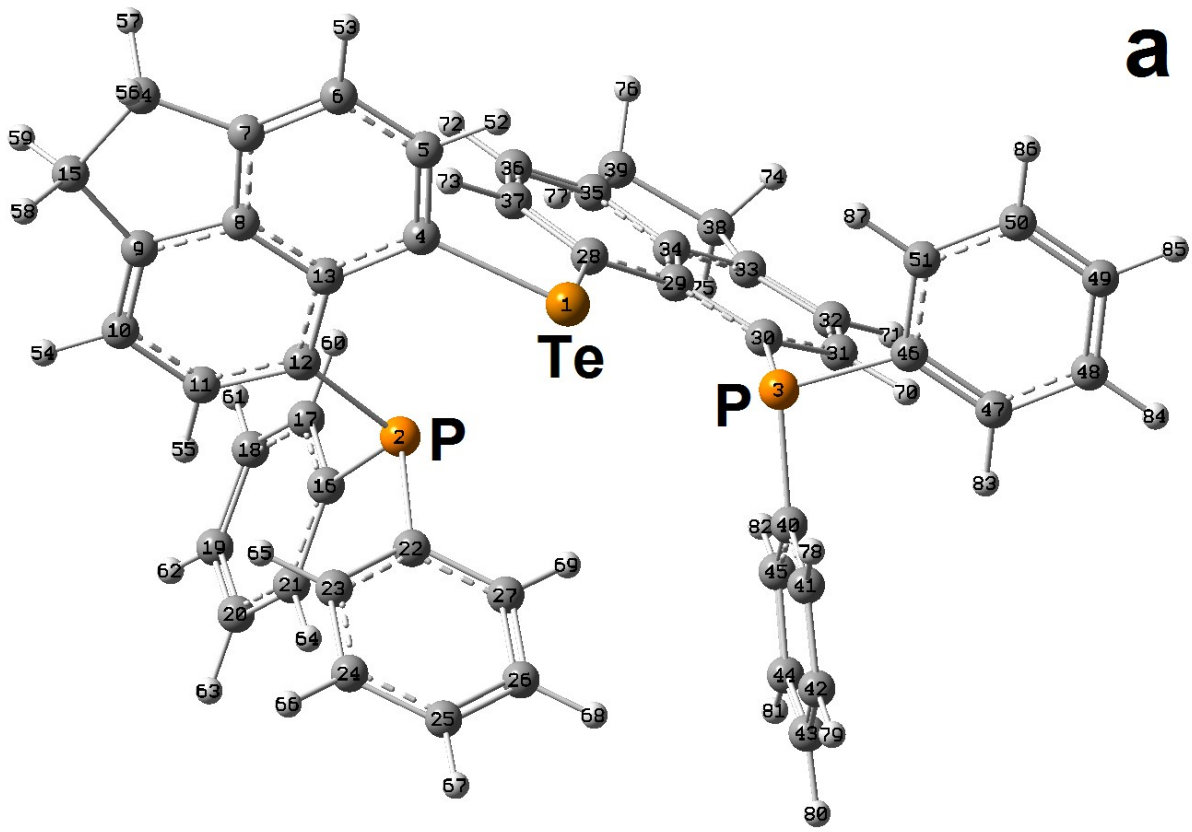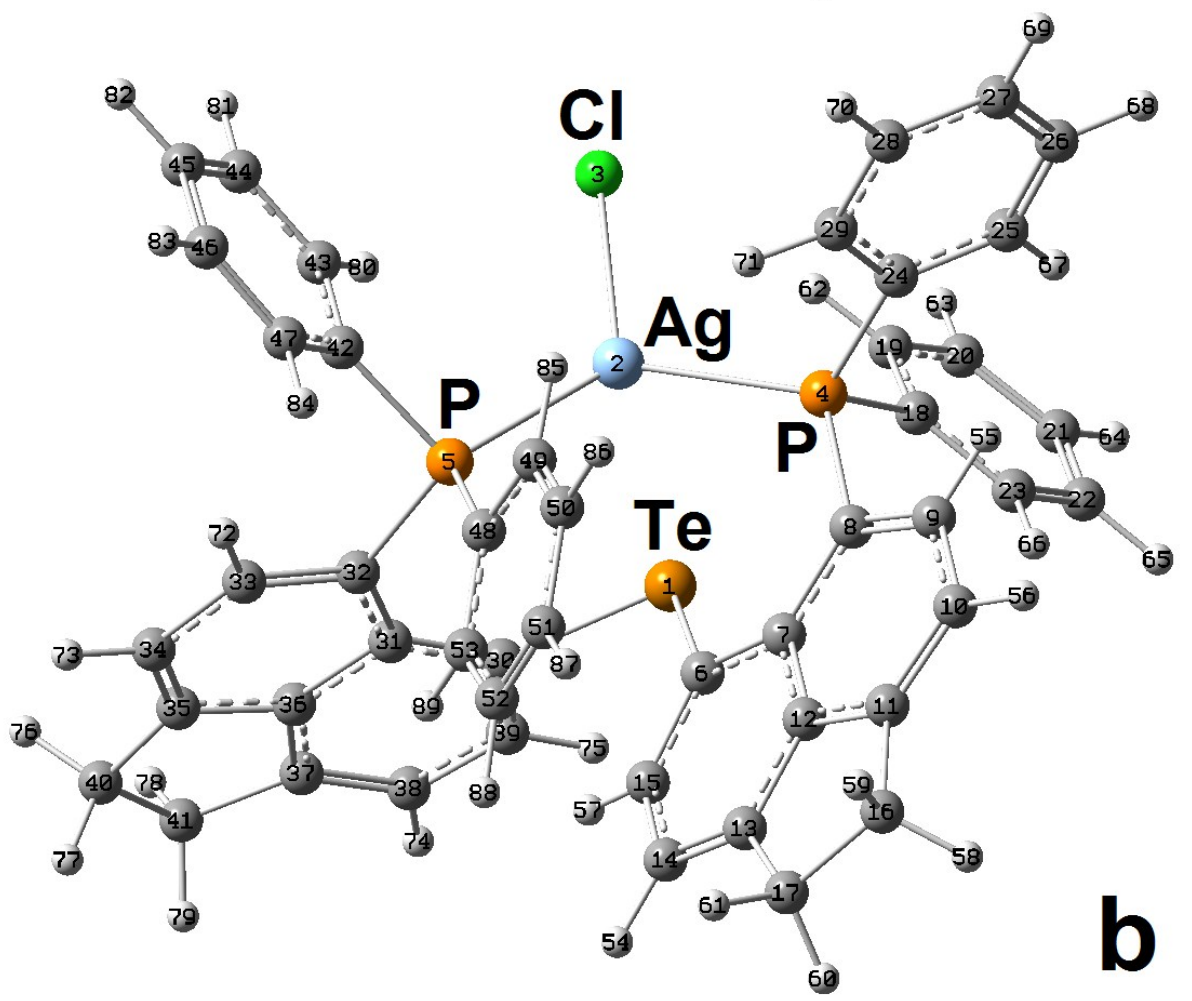

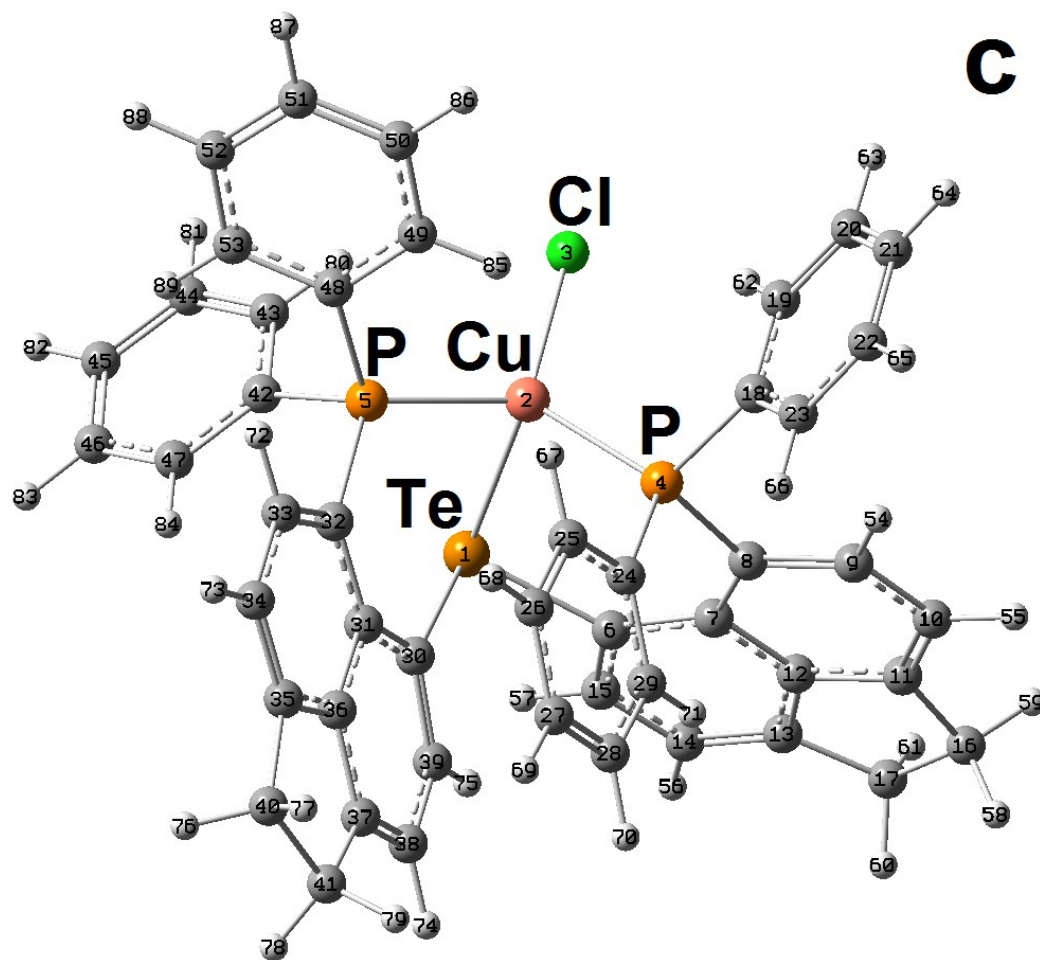

**Figure S5.** Labelling scheme for (a) 6, (b) 7, (c) 8.

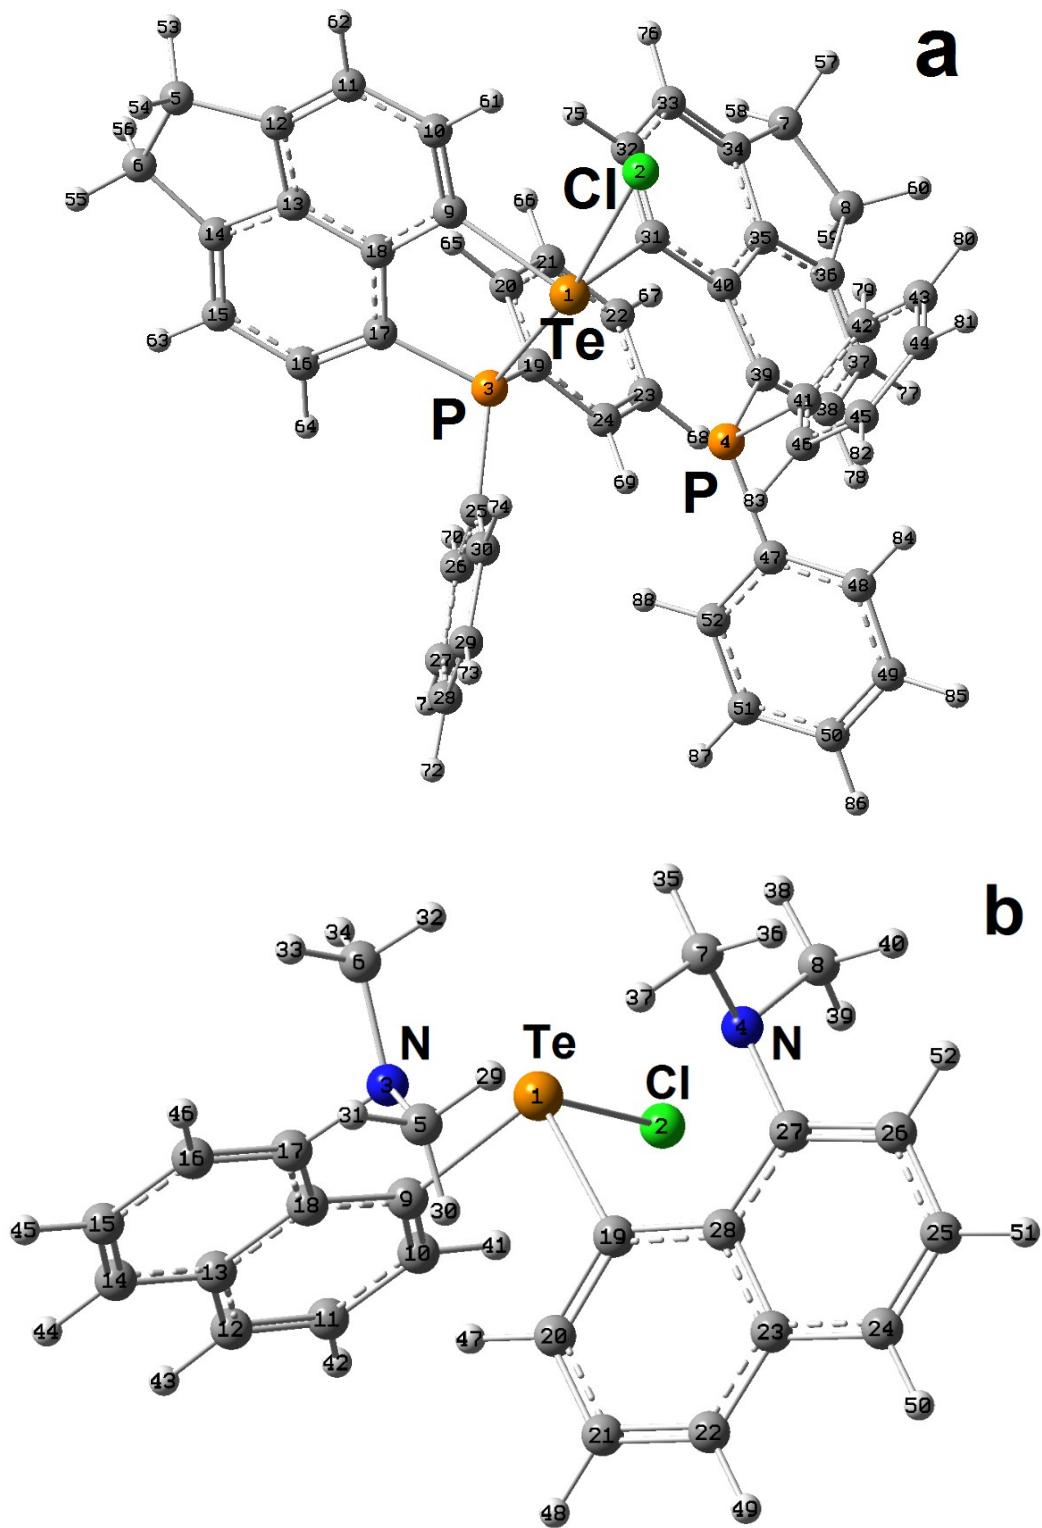

**Figure S6.** Labelling scheme for (a) 12', (b) 13'.
